# Supplementary material for: Characterization of the In Vivo and In Vitro Metabolites of Linarin in Rat Biosamples and Intestinal Flora Using Ultra-High Performance Liquid Chromatography Coupled with Quadrupole Time-of-Flight Tandem Mass Spectrometry
Source: MDPI journal article supplement (doi:10.3390/molecules23092140), 2018-08-25
Supplement: s1 [file s1]

Supporting Information for

**Characterization of the *in vivo* and *in vitro* metabolites of linarin in rat biosamples and intestinal flora using ultra-high performance liquid chromatography coupled with quadrupole time-of-flight tandem mass spectrometry**

Xinchi Feng<sup>1,†</sup>, Yang Li<sup>1,2,†</sup>, Chenxi Guang<sup>1,2</sup>, Miao Qiao<sup>1,2</sup>, Tong Wang<sup>1,2</sup>, Liwei Chai<sup>1,2</sup> and Feng Qiu<sup>1,2,\*</sup>

<sup>1</sup> School of Chinese Materia Medica, Tianjin University of Traditional Chinese Medicine, Tianjin 300193, China

<sup>2</sup> Tianjin State Key Laboratory of Modern Chinese Medicine, Tianjin University of Traditional Chinese Medicine, Tianjin 300193, China

\* Correspondence: fengqiu20070118@163.com; Tel.: +86-22-5959-6223

† These authors contributed equally to this work.

## Supplemental Figures

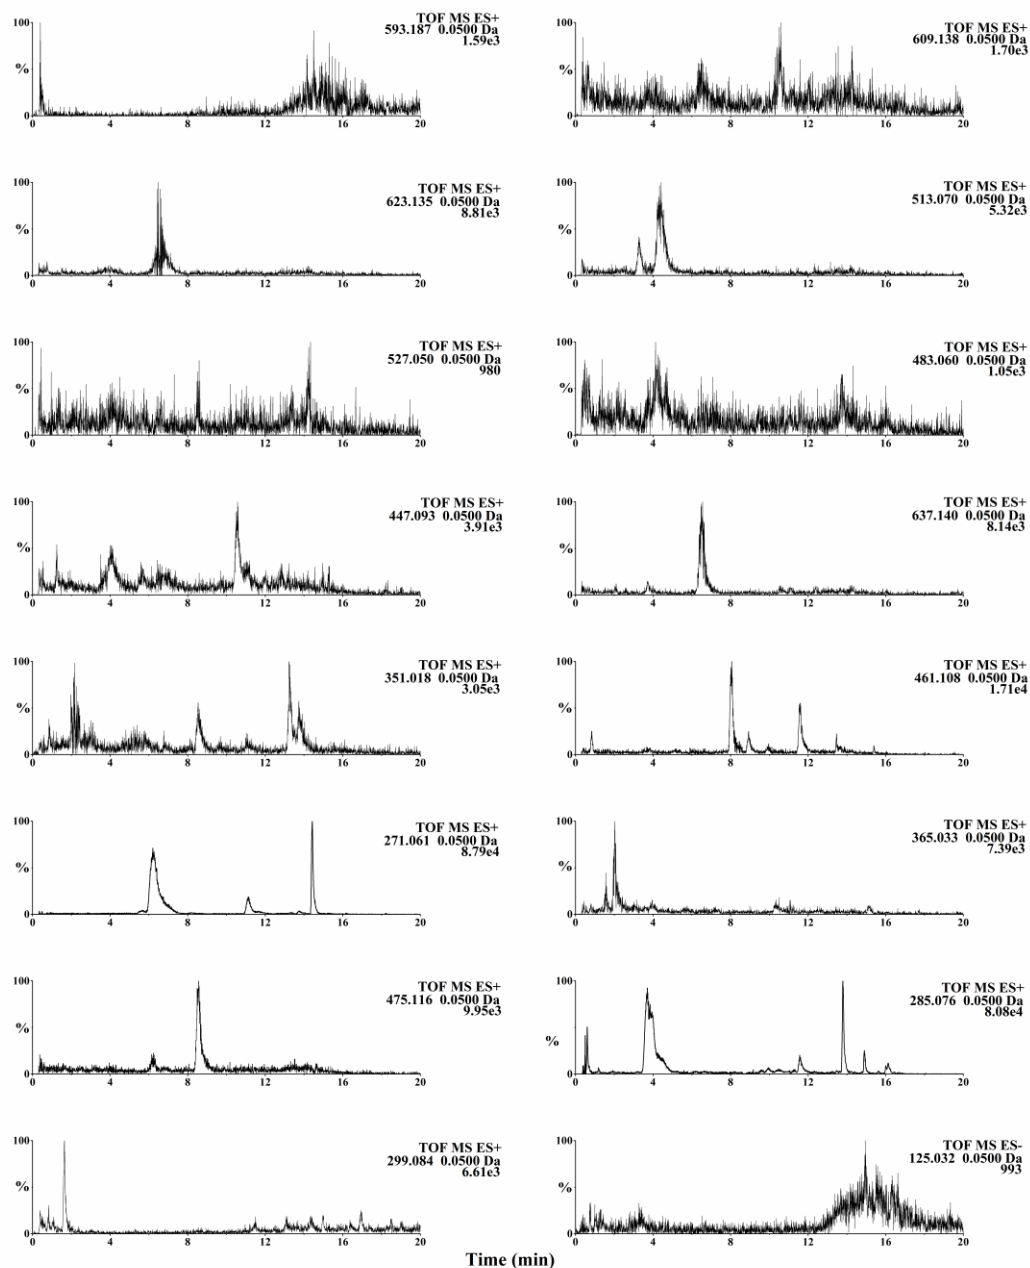

Fig.S1

**Figure S1** Extracted ion chromatograms (EICs) of linarin metabolites in blank rat biosamples.
